# Supplementary material
Source: publisher figshare collection journal article supplement (https://wiley.figshare.com/articles/dataset/_/3547428)
Supplement: Supplementary file 1 [file 1 › appendix-B.htm]

Ecological Archives E091-147-A2

### *Ecological Archives* E091-147-A2

### **Ilyas Siddique, Ima Célia Guimarães Vieira, Susanne Schmidt, David Lamb, Cláudio José Reis Carvalho, Ricardo de Oliveira Figueiredo, Simon Blomberg, and Eric A. Davidson. 2010. Nitrogen and phosphorus additions negatively affect tree species diversity in tropical forest regrowth trajectories. *Ecology* 91:2121–2131.**

Appendix B. Quantification and detailed responses of tree species diversity.

> View / download PDF.

---


[Back to E091-147]
